# Supplementary material for: The separate and combined effects of adiposity and cardiometabolic dysfunction on the risk of recurrent cardiovascular events and mortality in patients with manifest vascular disease
Source: HighWire-hosted journal article supplement (doi:10.1136/heartjnl-2014-305490), 2014-05-09
Supplement: heartjnl-2014-305490supp.pdf [file heartjnl-2014-305490supp.pdf]

## Appendix 1. Definitions of vascular events and mortality

| Outcome event               | Definition                                                                                                                                                                                                                                                                                                                                                                                                                                                                                                                                                                                                                                                            |
|-----------------------------|-----------------------------------------------------------------------------------------------------------------------------------------------------------------------------------------------------------------------------------------------------------------------------------------------------------------------------------------------------------------------------------------------------------------------------------------------------------------------------------------------------------------------------------------------------------------------------------------------------------------------------------------------------------------------|
| Myocardial infarction       | <p>At least two of the following criteria:</p> <p>(I) Chest pain for at least 20 min, not disappearing after administration of nitrates;</p> <p>(II) ST-elevation &gt; 1 mm in two following leads or a left bundle branch block on the electrocardiogram;</p> <p>(III) Troponin elevation above clinical cut-off values or creatinine kinase (CK) elevation of at least two times the normal value of CK and a myocardial band-fraction &gt; 5% of the total CK.</p> <p>Sudden death: unexpected cardiac death occurring within 1 hour after onset of symptoms, or within 24 hours given convincing circumstantial evidence.<br/>ICD-10 codes I21-22, I46.1, R96</p> |
| Stroke                      | <p>Relevant clinical features causing an increase in impairment of at least one grade on the modified Rankin scale, preferably with evidence of intracerebral hemorrhage or ischemia on brain imaging.<br/>ICD-10 codes I60-61, I63-64</p>                                                                                                                                                                                                                                                                                                                                                                                                                            |
| Vascular mortality          | <p>Death from stroke, myocardial infarction, congestive heart failure, or rupture of abdominal aortic aneurysm.<br/>Vascular death from other causes<br/>ICD-10 codes I00-28, I31, I34-37, I42-99, F01, K55, R96</p>                                                                                                                                                                                                                                                                                                                                                                                                                                                  |
| Major cardiovascular events | <p>A composite of stroke, myocardial infarction, retinal infarction, and vascular mortality.<br/>ICD-10 codes I21-22, I46.1, I60-61, I63-64, H34.1, H34.8 or death resulting from ICD-10 codes I00-28, I31, I34-37, I42-99, F01, K55, R96</p>                                                                                                                                                                                                                                                                                                                                                                                                                         |
| All-cause mortality         | <p>Death from any cause<br/>Death resulting from ICD-10 codes A00-Y98</p>                                                                                                                                                                                                                                                                                                                                                                                                                                                                                                                                                                                             |
